# Supplementary material for: Novel urchin-like Fe2O3@SiO2@TiO2 microparticles with magnetically separable and photocatalytic properties
Source: Royal Society of Chemistry journal article supplement (doi:10.1039/c5ra08070c), 2015-01-01
Supplement: c5ra08070c1.pdf [file c5ra08070c1.pdf]

1 Supporting Information

2

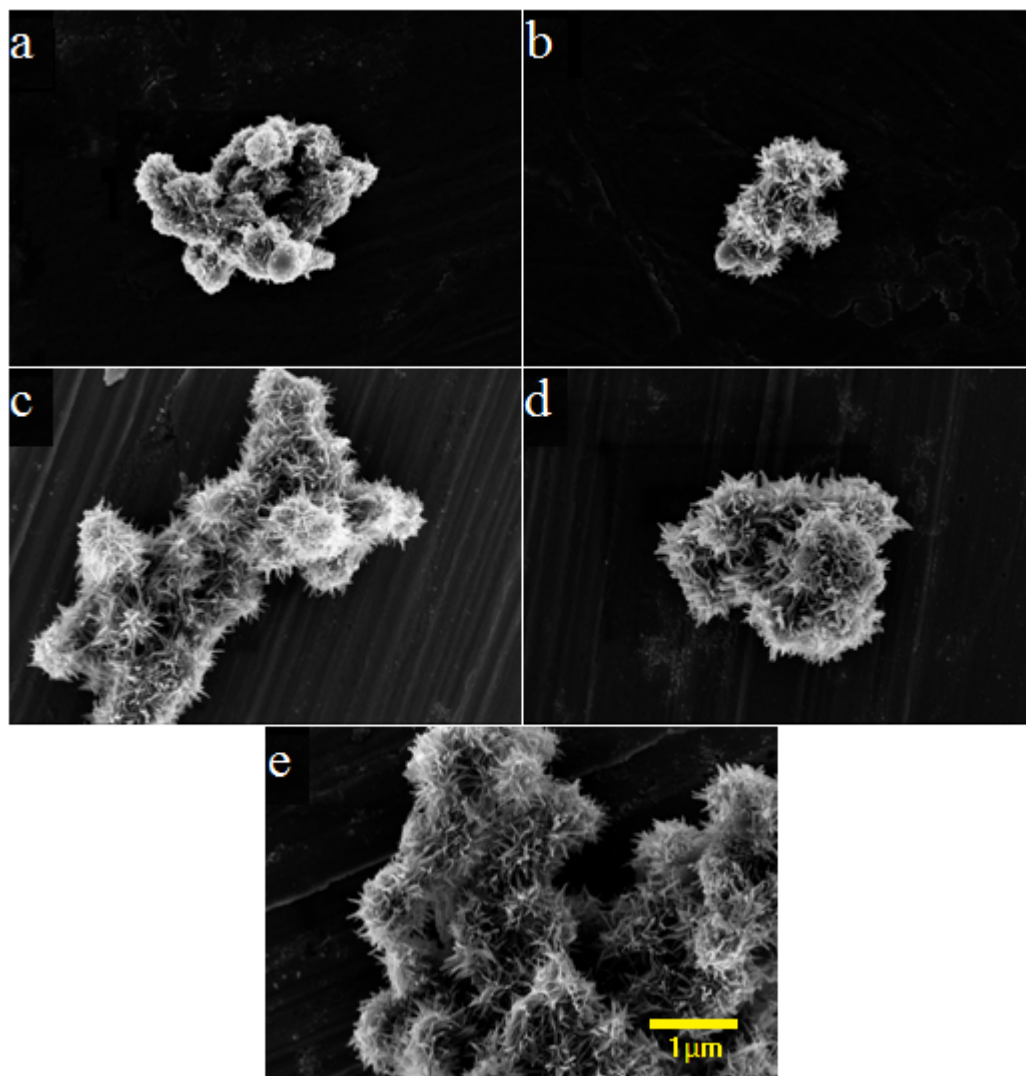

**Figure S1** Electron microscopy images: (a) – (e) SEM of the MSST with different durations of solvothermal process

3

4

5 Nitrogen adsorption measurements were carried on the MSST and P25 with Micromeritics ASAP  
6 2020 analyzer. The nitrogen adsorption isotherm is shown in figure S2. BET specific surface areas  
7 were calculated in the relative pressure range of 0.066 – 0.2 and that of MSST and P25 were  
8 determined to be 77.3 and 51.9 m<sup>2</sup>/g, respectively.

9

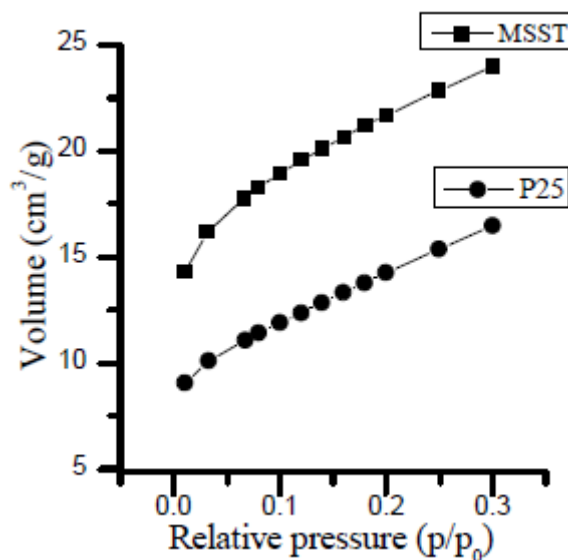

**Figure S2** Nitrogen adsorption isotherms of MSST and P25 at 77K

10

11

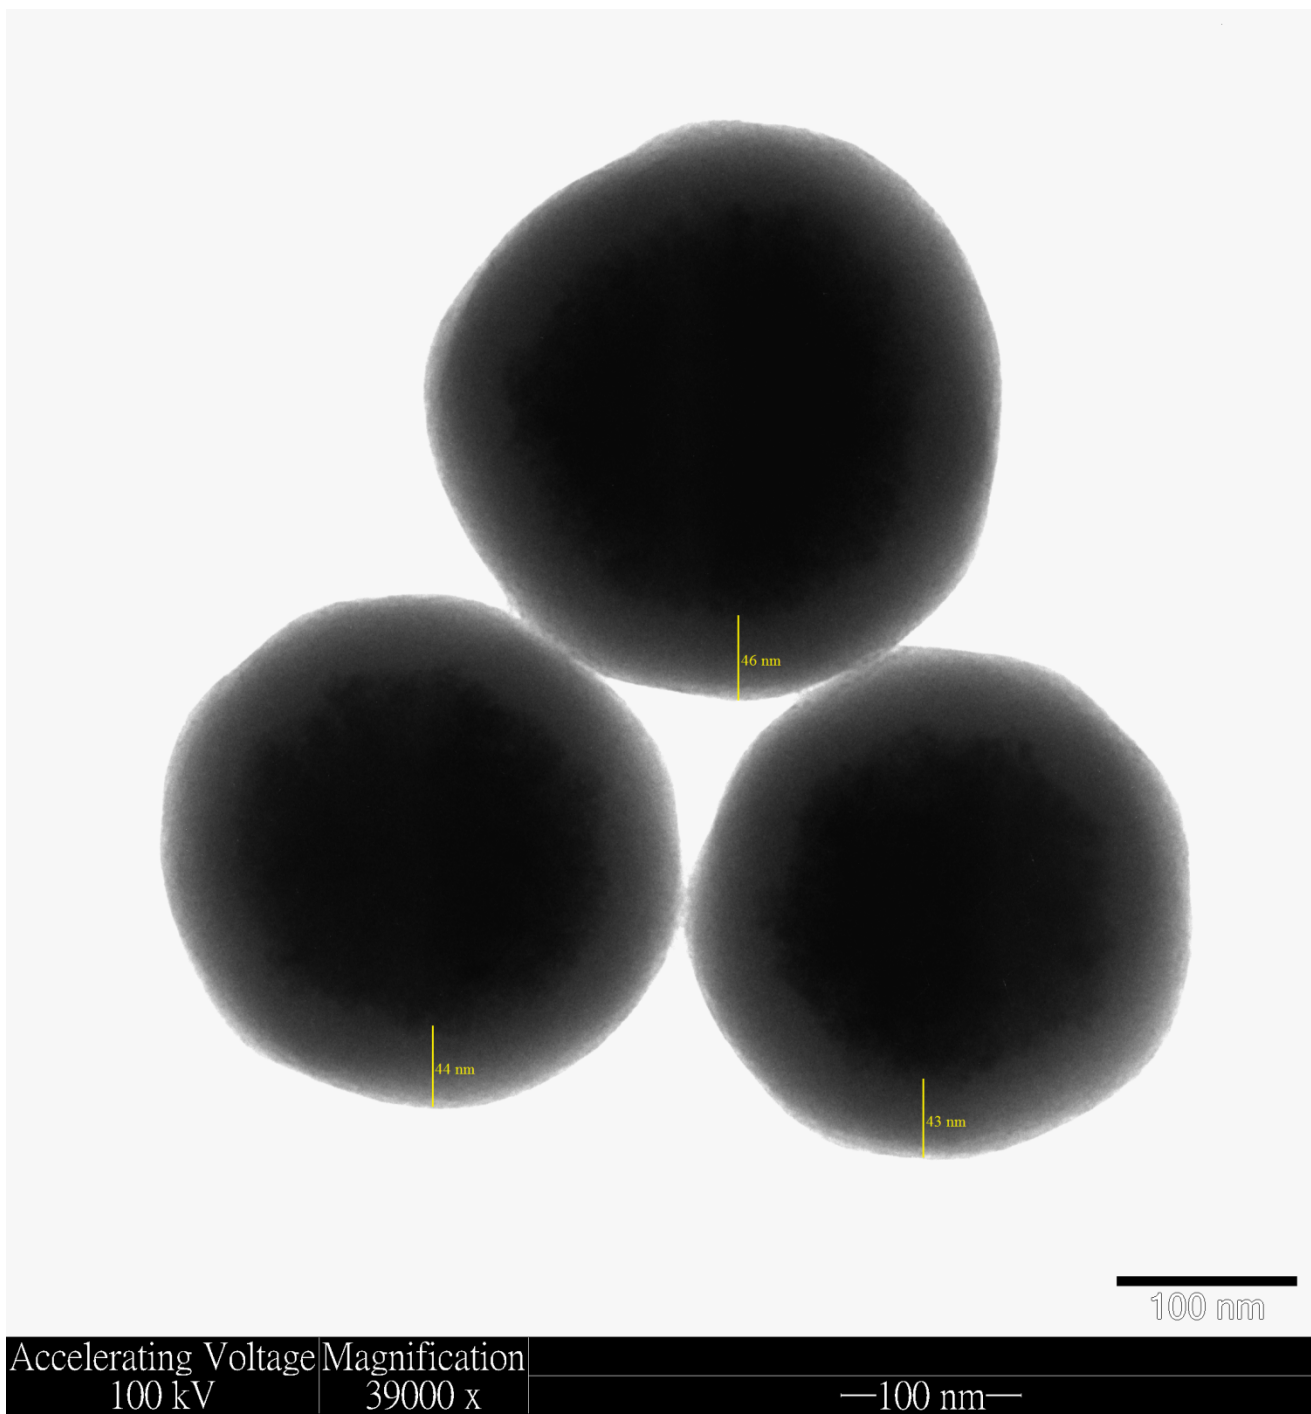

**Figure S3** TEM image of the Fe<sub>3</sub>O<sub>4</sub> @ SiO<sub>2</sub> showing the thickness of SiO<sub>2</sub> layer

12

13
